# Supplementary material for: Development of new method to enrich human iPSC-derived renal progenitors using cell surface markers
Source: PubMed Central journal article supplement (PMC5913312; doi:10.1038/s41598-018-24714-3), 2018-04-23
Supplement: 41598_2018_24714_MOESM1_ESM.pdf [file 41598_2018_24714_MOESM1_ESM.pdf]

## **Supplementary information**

**Development of new method to enrich human iPSC-derived renal progenitors using cell surface markers**

**Azusa Hoshina<sup>1</sup>, Tatsuya Kawamoto<sup>2</sup>, Shin-Ichi Sueta<sup>1</sup>, Shin-Ichi Mae<sup>1</sup>, Toshikazu Araoka<sup>1</sup>,  
Hiromi Tanaka<sup>1</sup>, Yasunori Sato<sup>3</sup>, Yukiko Yamagishi<sup>2</sup>, Kenji Osafune<sup>1\*</sup>**

**<sup>1</sup>Center for iPS Cell Research and Application (CiRA), Kyoto University, Kyoto, Japan**

**<sup>2</sup>Drug Discovery Research, Astellas Pharma Inc, Tsukuba, Ibaraki, Japan**

**<sup>3</sup>Department of Global Clinical Research, Graduate School of Medicine, Chiba University, 1-8-1 Inohana, Chuo-ku, Chiba, Japan**

**\*Corresponding author**

**Kenji Osafune. Address: 53 Kawahara-cho, Shogoin, Sakyo-ku, Kyoto 606-8507, Japan. E-mail address: osafu@cira.kyoto-u.ac.jp**

**Tatsuya Kawamoto. Address: 21 Miyukigaoka, Tsukuba, Ibaraki 305-8585, Japan. E-mail address: tatsuya.kawamoto@astellas.com**

Fig. S1

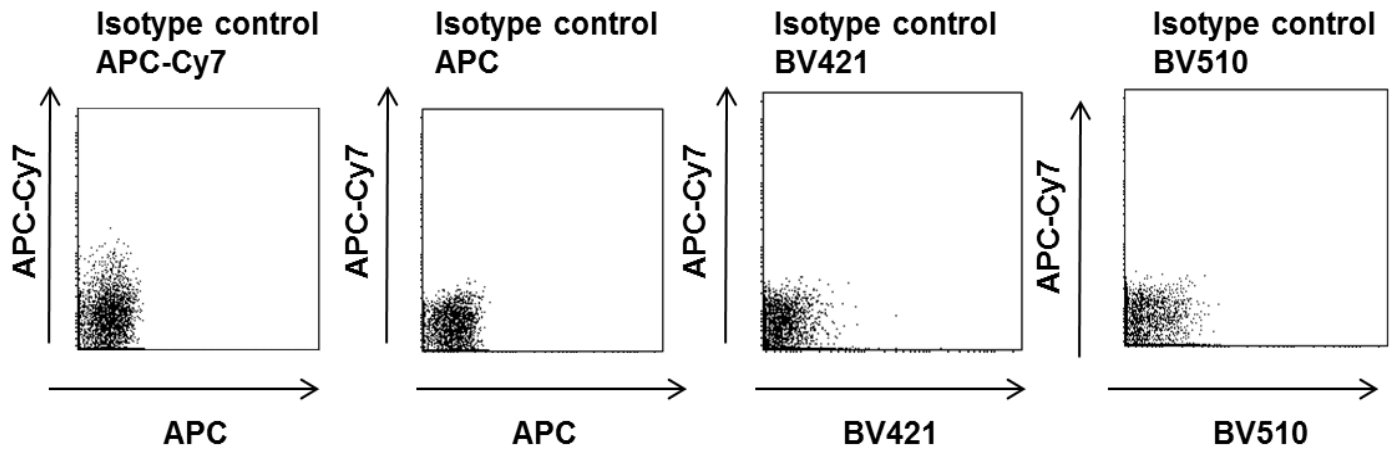

**Figure S1. Flow cytometric analysis using isotype controls, related to Fig. 1E.**  
Flow cytometric analysis using IgG isotypes corresponding to each surface marker.

Fig. S2

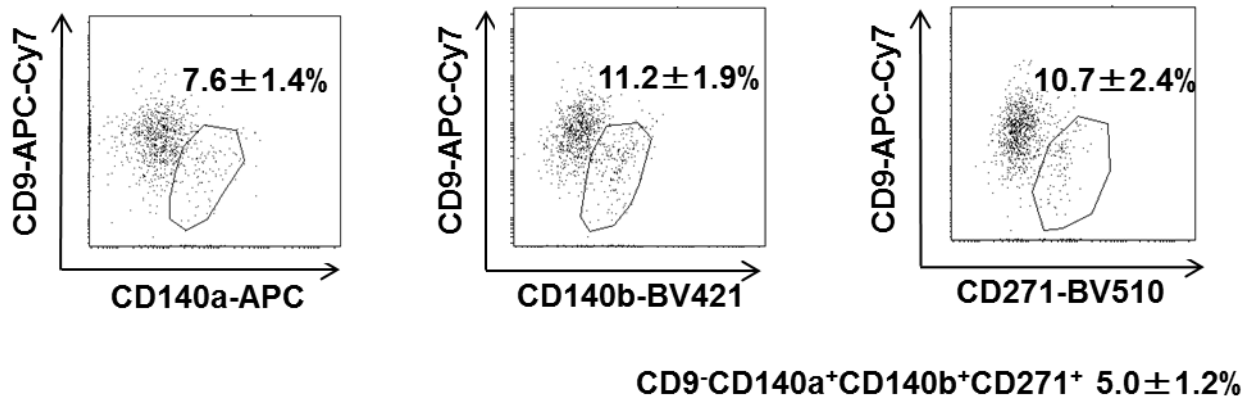

**Figure S2. Flow cytometric analysis using cell surface markers on 585A1 cells.**

Differentiated cells fractionated with antibodies directed against CD9, CD140a, CD140b and CD271 on culture days 28-30. Representative data from at least three independent experiments are shown and are presented as the mean ± SE (n=3).

Fig. S3

Other mesodermal tissues

Cardiomyocyte

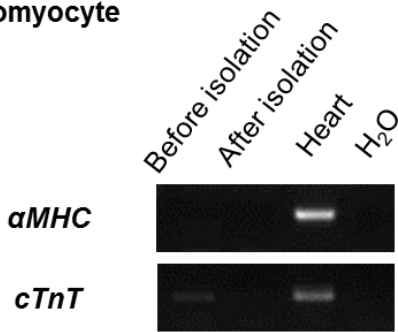

Blood

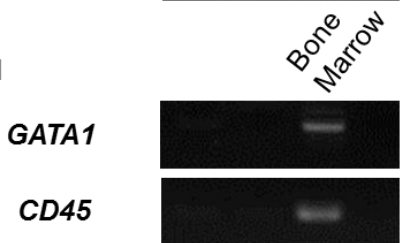

Vascular endothelium

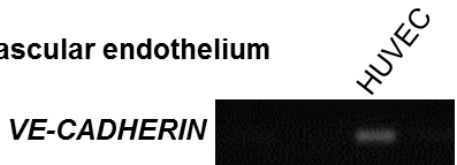

Skeletal muscle

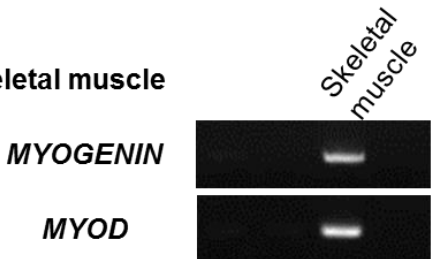

Bone

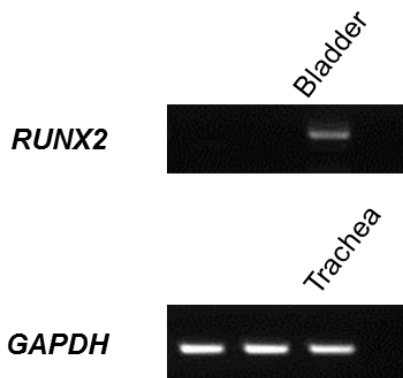

Endodermal tissues

Pancreas

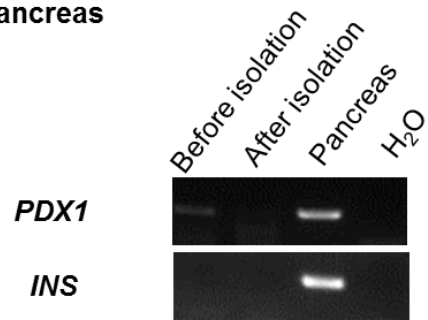

Intestine

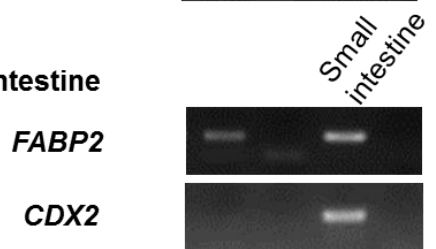

Liver

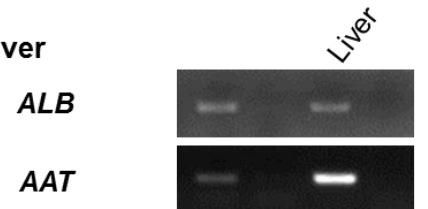

Lung

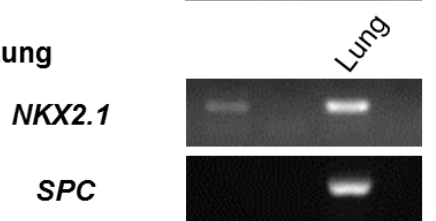

Ectodermal tissues

Neuron

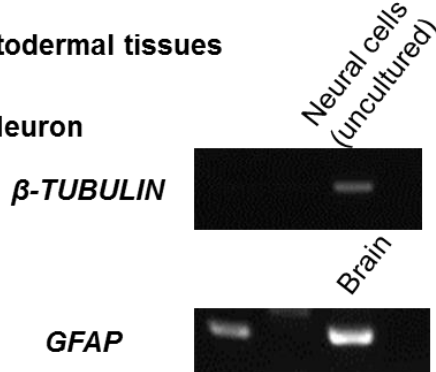

Figure S3. The expression of other lineage markers in CD9<sup>+</sup>CD140a<sup>+</sup>CD140b<sup>+</sup>CD271<sup>+</sup> cells isolated from hiPSC differentiated cultures.

The gene expressions of markers for other mesodermal, endodermal and ectodermal lineages in cells before isolation and CD9<sup>+</sup>CD140a<sup>+</sup>CD140b<sup>+</sup>CD271<sup>+</sup> cells isolated on day 28 as analyzed by RT-PCR. *αMHC*, alpha-myosin heavy chain; *cTnT*, cardiac troponin T; HUVEC, human umbilical vein endothelial cell; *INS*, insulin; *FABP2*, fatty acid binding protein; *ALB*, albumin; *AAT*, alpha-1 antitrypsin; *SPC*, surfactant protein C; *GFAP*, glial fibrillary acidic protein.

Fig. S4

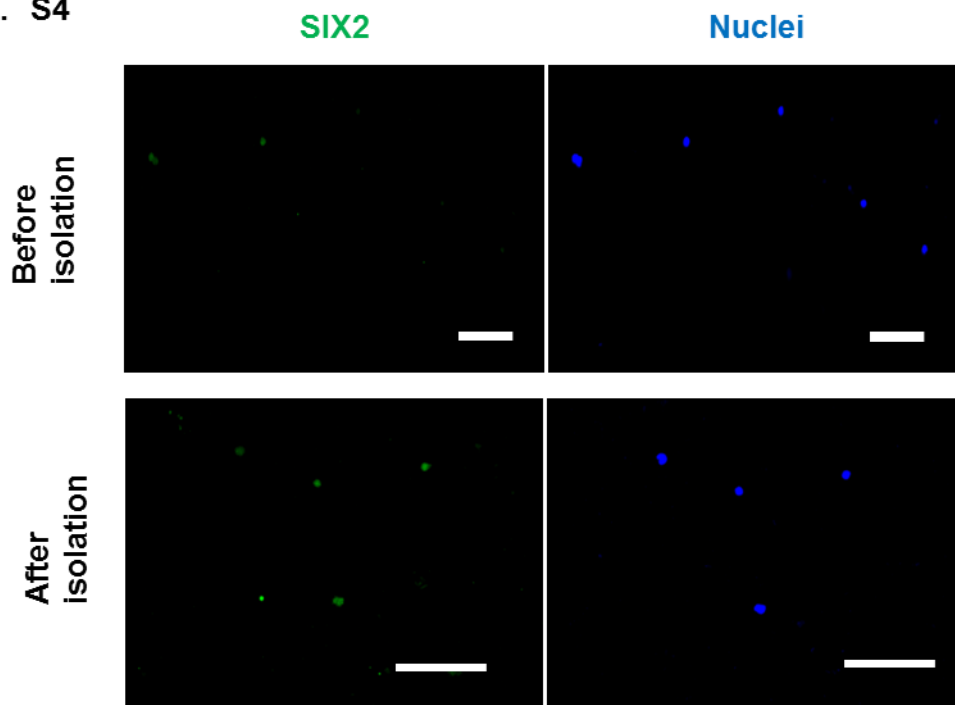

**Figure S4. The expression of SIX2 in CD140a<sup>+</sup>CD140b<sup>+</sup> cells isolated from hiPSC differentiation culture by a previously reported method<sup>12</sup>.**

Anti-SIX2 immunostaining images of the cells before isolation (upper panels) and isolated CD140a<sup>+</sup>CD140b<sup>+</sup> cells (lower panels) on culture day 15. Scale bars, 100  $\mu$ m. Representative data from at least three independent experiments are shown.

Fig. S5

A

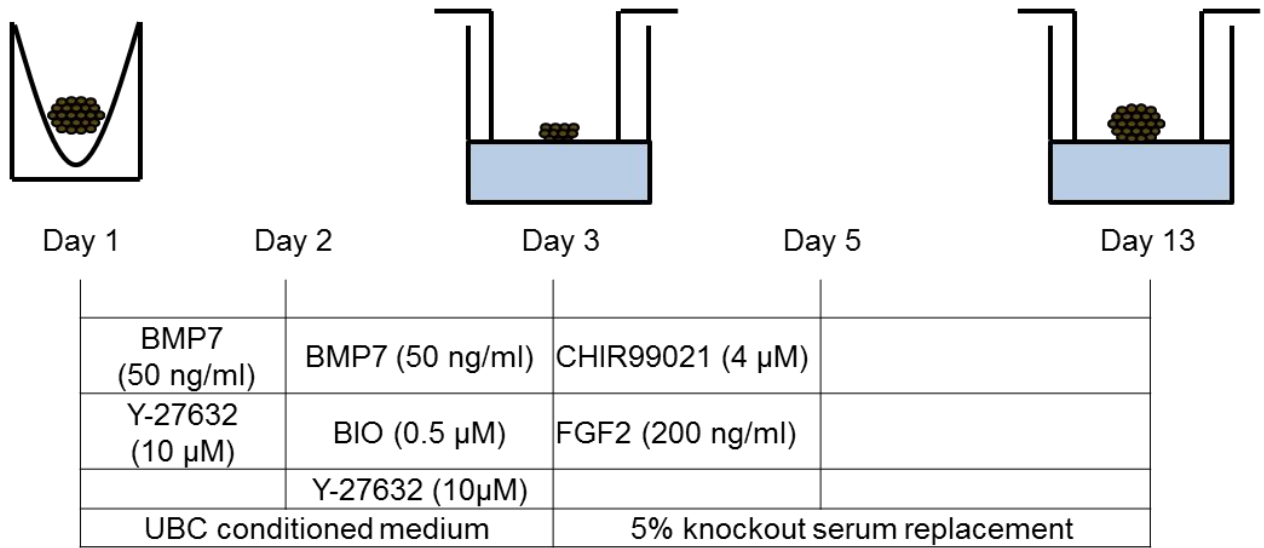

B

Merge

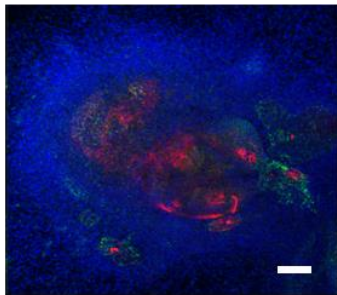

C

Hoechst33342

LTL

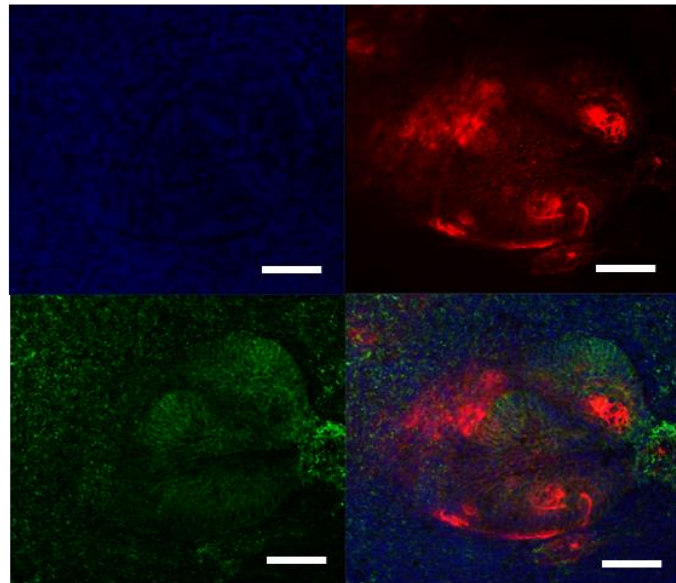

E-cadherin

Merge

**Figure S5. Developmental potential of hiPSC-derived CD9<sup>-</sup>CD140a<sup>+</sup>CD140b<sup>+</sup>CD271<sup>+</sup> cells to differentiate into renal lineage cells.**

(A) A schematic showing cell aggregate cultures in an organ culture setting. (B, C) Images of *Lotus tetragonolobus* lectin (LTL) and anti-E-cadherin antibody stainings of CD9<sup>-</sup>CD140a<sup>+</sup>CD140b<sup>+</sup>CD271<sup>+</sup> cell aggregates after 10 days of organ culture. Panels in (C) are magnified views of (B) with individual staining or merged staining. Representative data from at least three independent experiments are shown in (B) and (C). Scale bars, 100  $\mu$ m.

Fig. S6

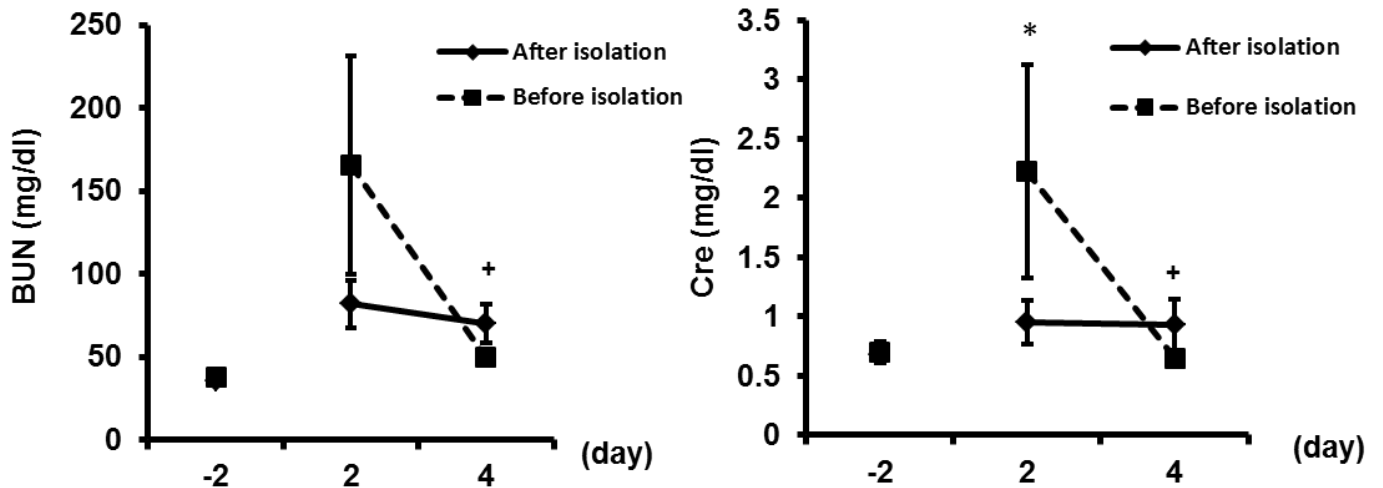

**Figure S6. Therapeutic effects of cell therapy for acute kidney injury (AKI) model mice using differentiated cells before isolation or isolated CD9<sup>+</sup>CD140a<sup>+</sup>CD140b<sup>+</sup>CD271<sup>+</sup> cells.** Time course analysis of blood urea nitrogen (BUN, left) and serum creatinine (Cre, right) levels in ischemia/reperfusion (I/R) AKI mice that received a renal subcapsular transplantation of hiPSC-derived CD9<sup>+</sup>CD140a<sup>+</sup>CD140b<sup>+</sup>CD271<sup>+</sup> cells (n=4, after isolation, diamond) or differentiated cells before isolation (n=4, square). Statistical significance: \*P<0.05 vs. before isolation after multiple testing adjustment. Least square means and 95% confidence intervals were estimated according to the mixed effects model for repeated measures. +, Two mice out of four transplanted with cells before isolation died between days 2 to 4 after I/R and transplantation.

Full unedited gel for Figure S3

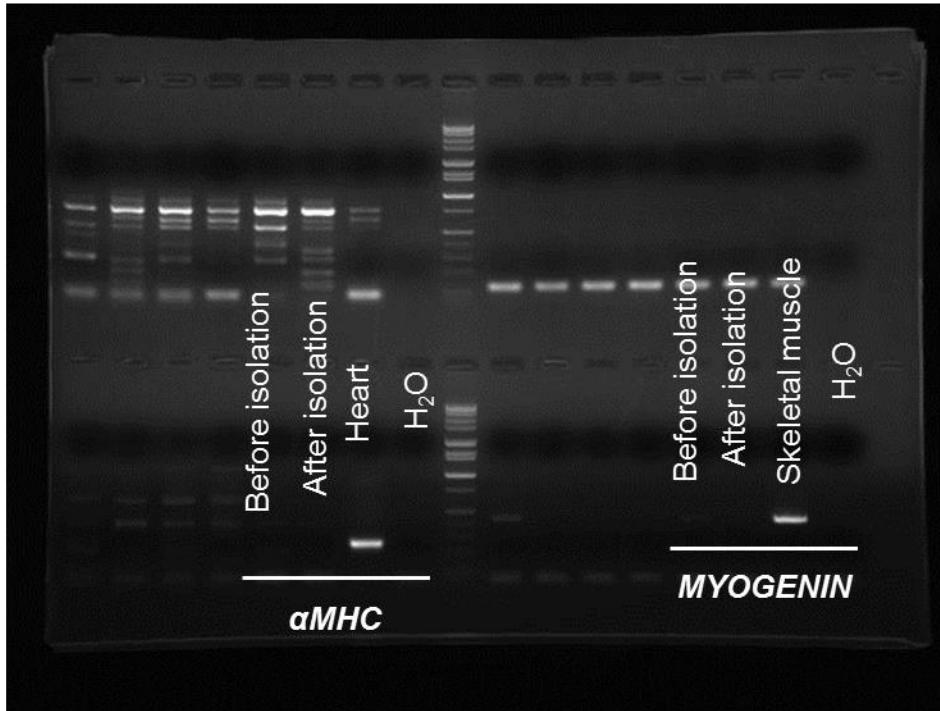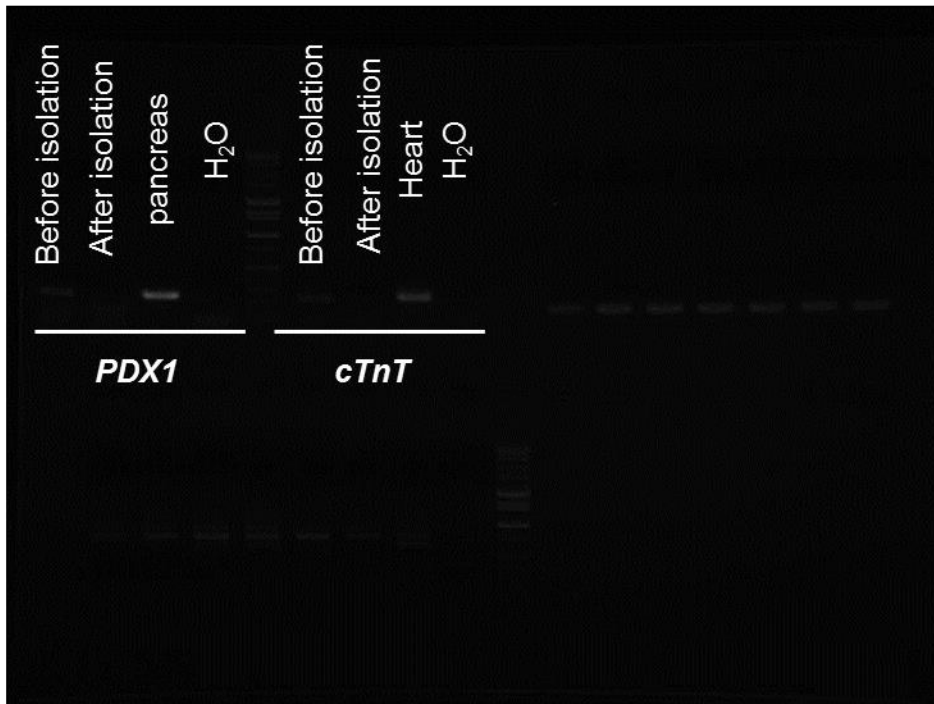



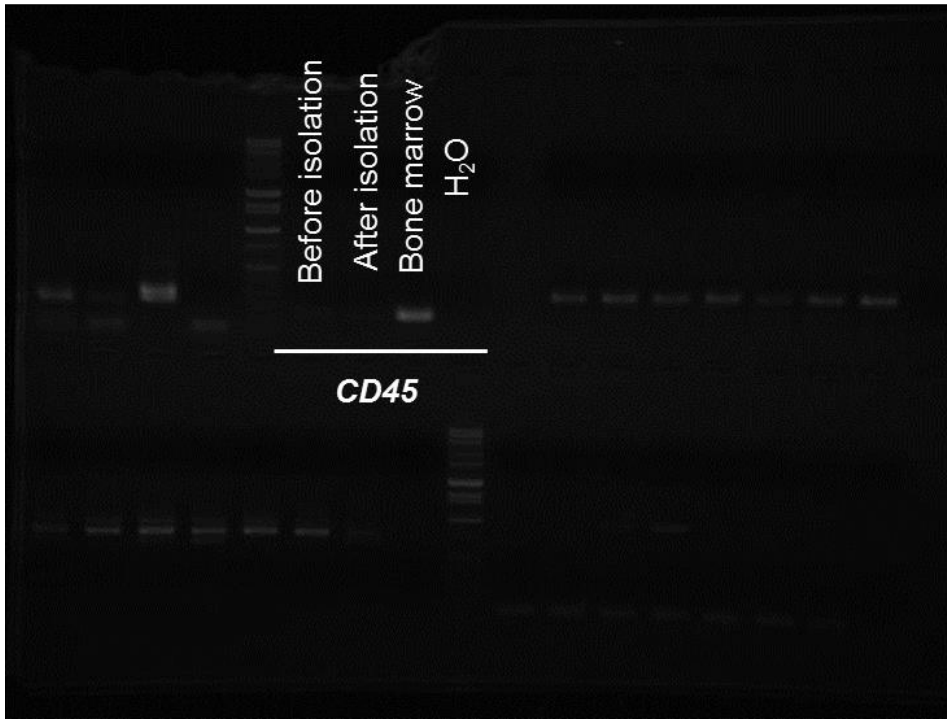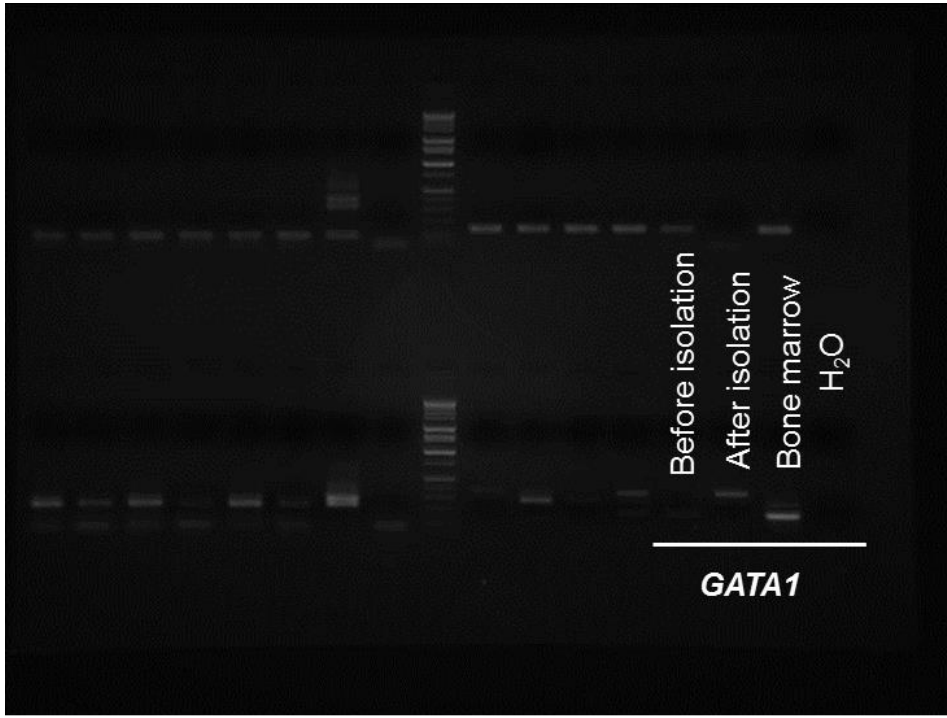

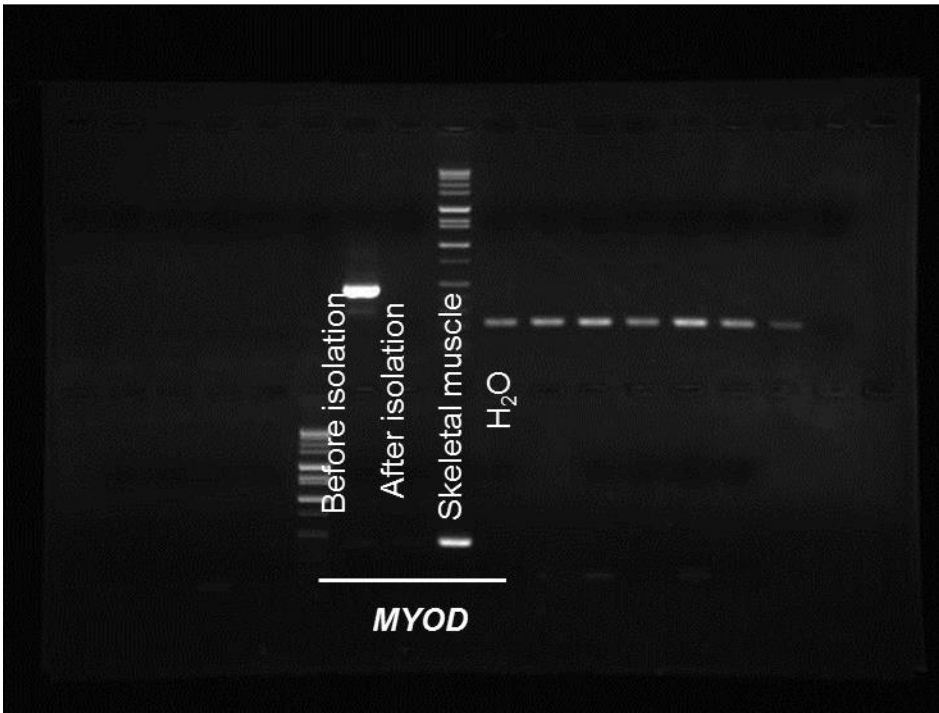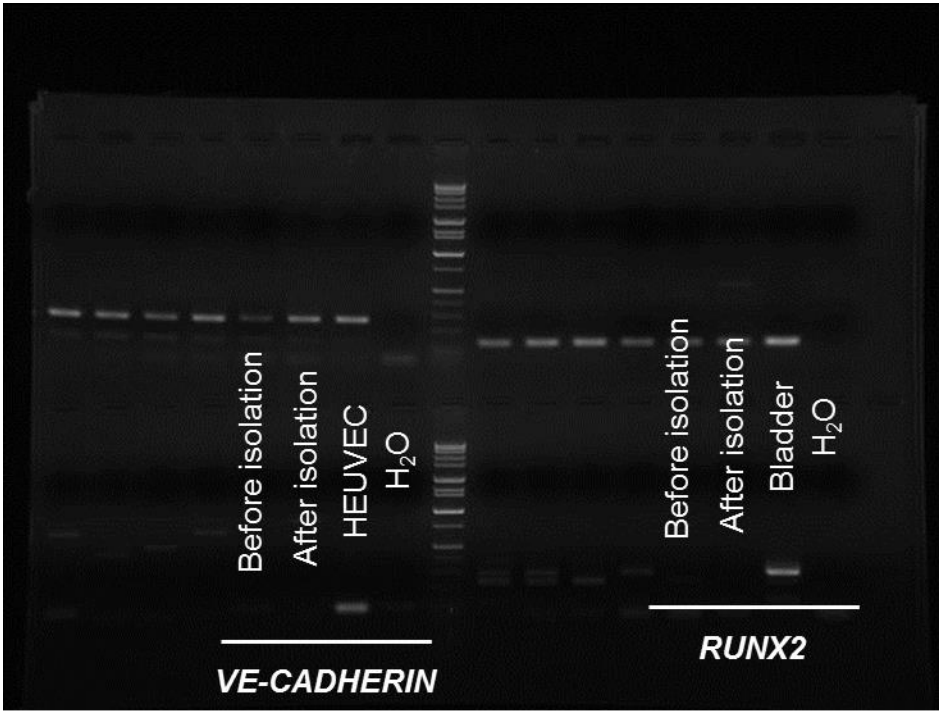

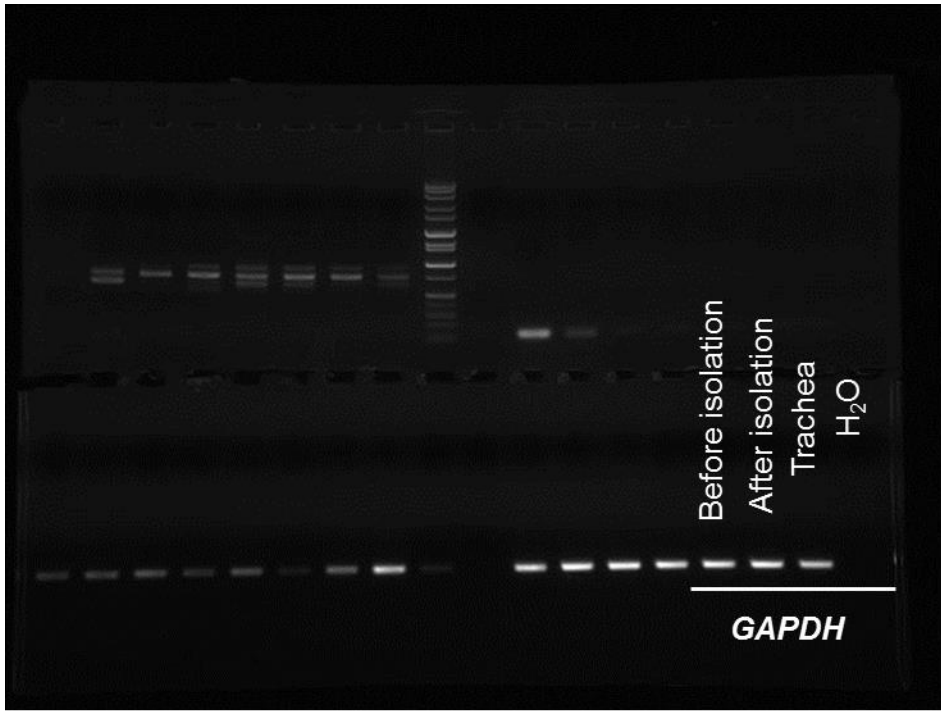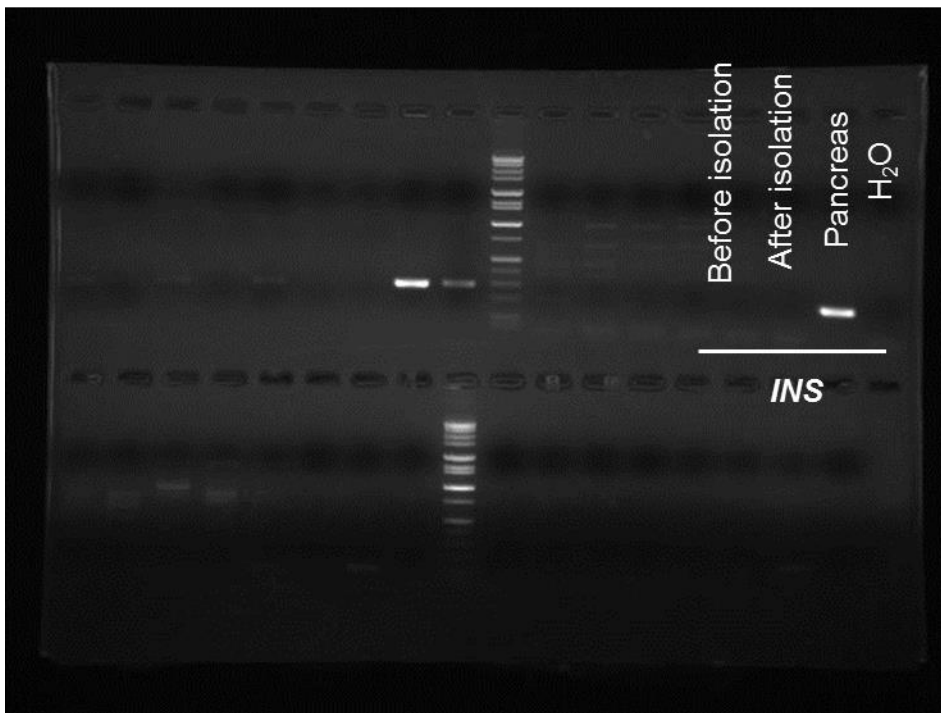

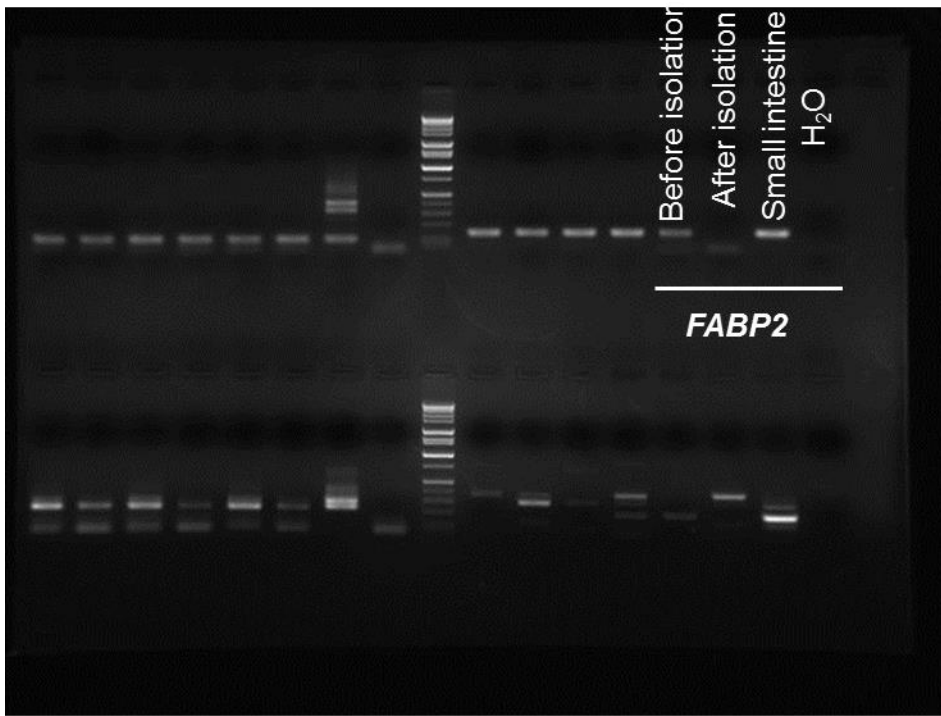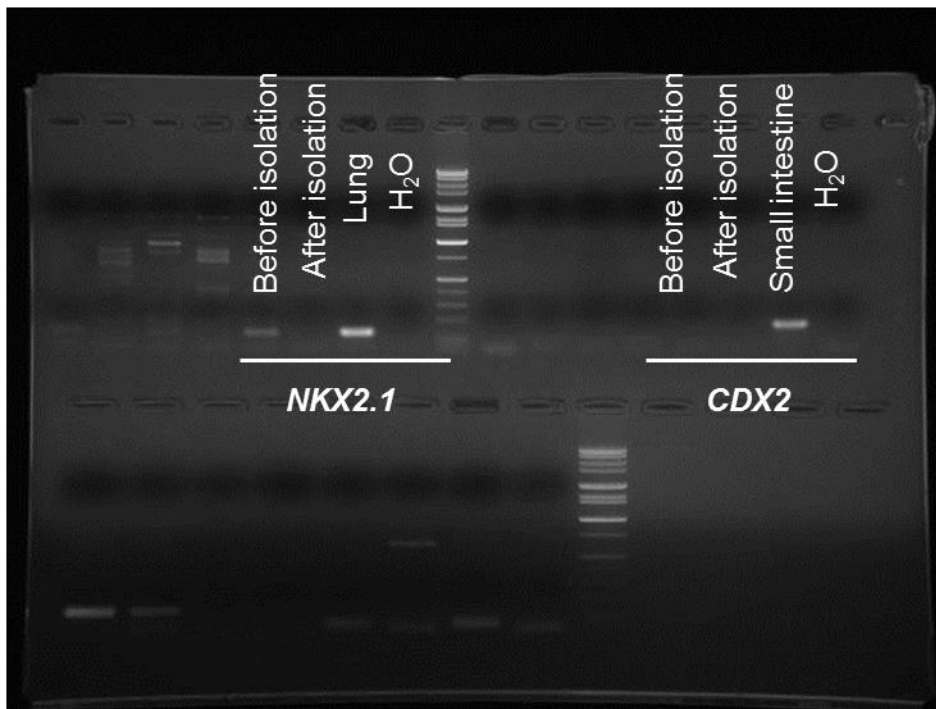

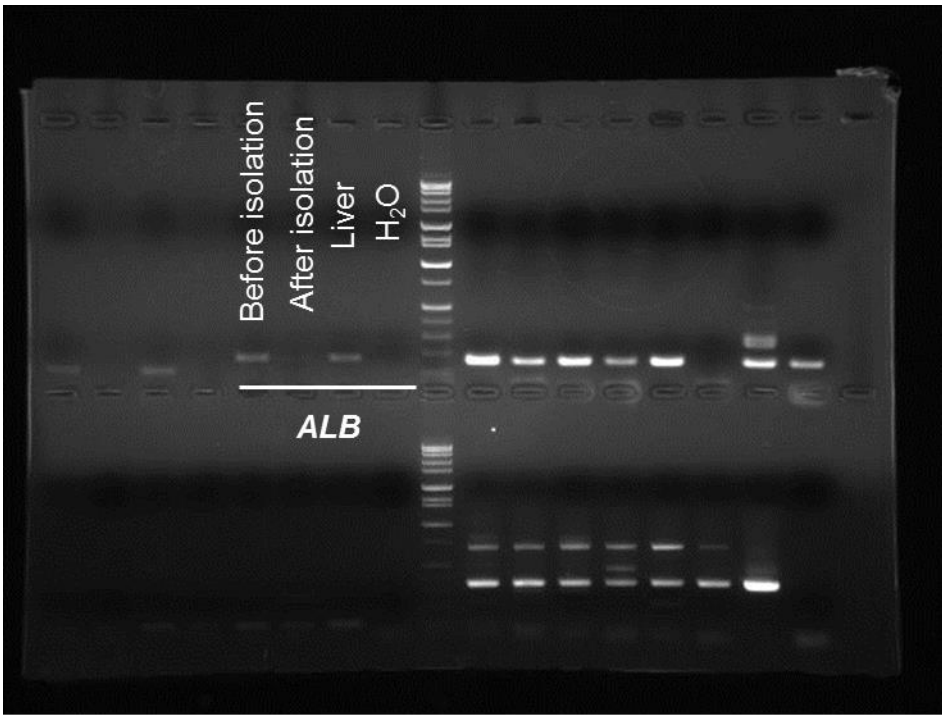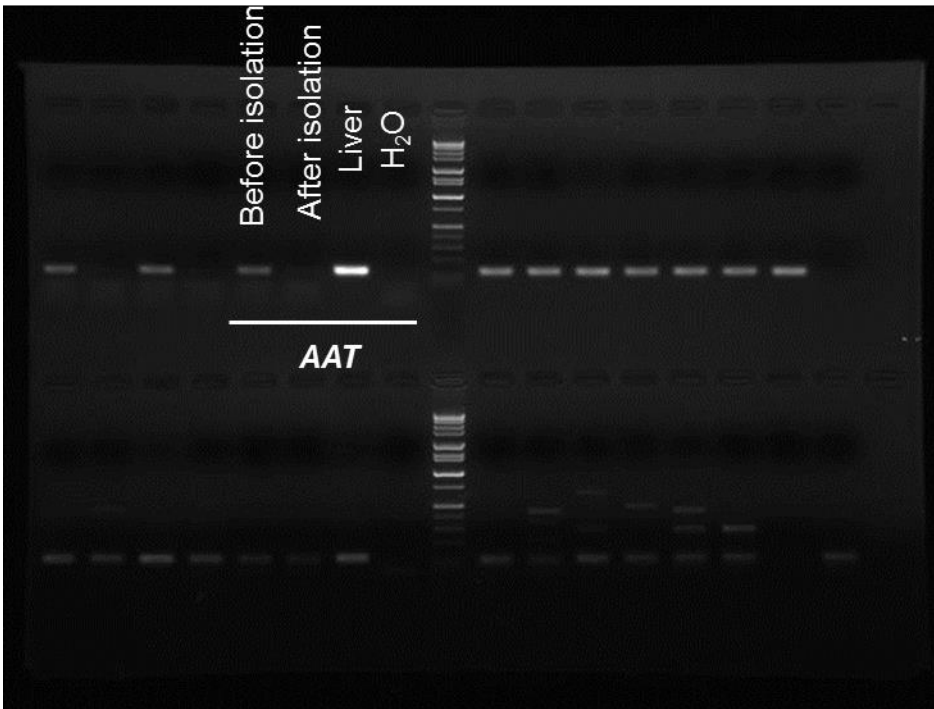

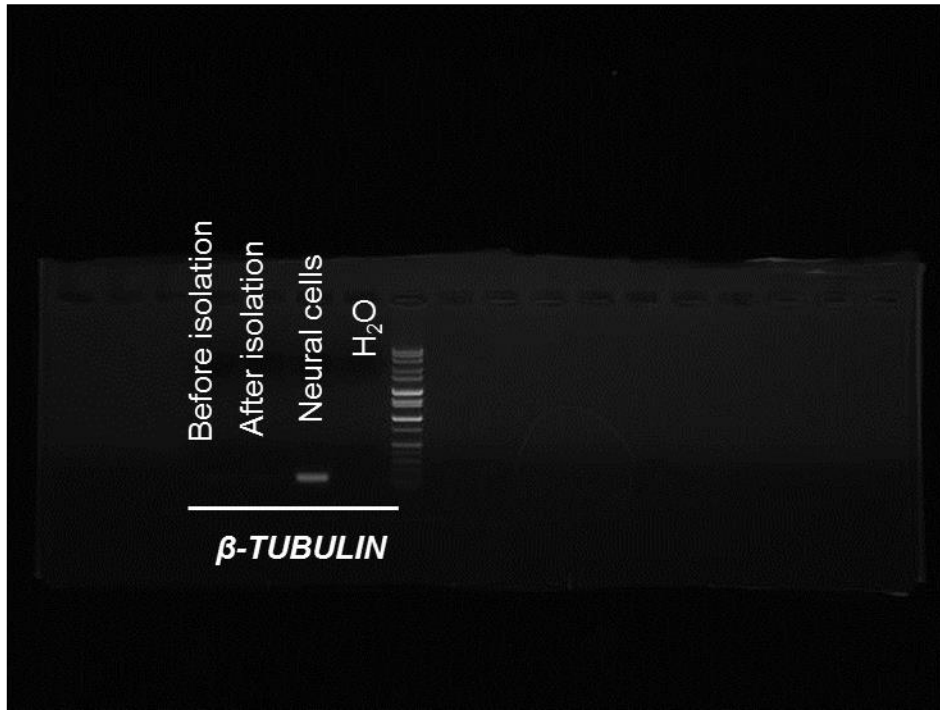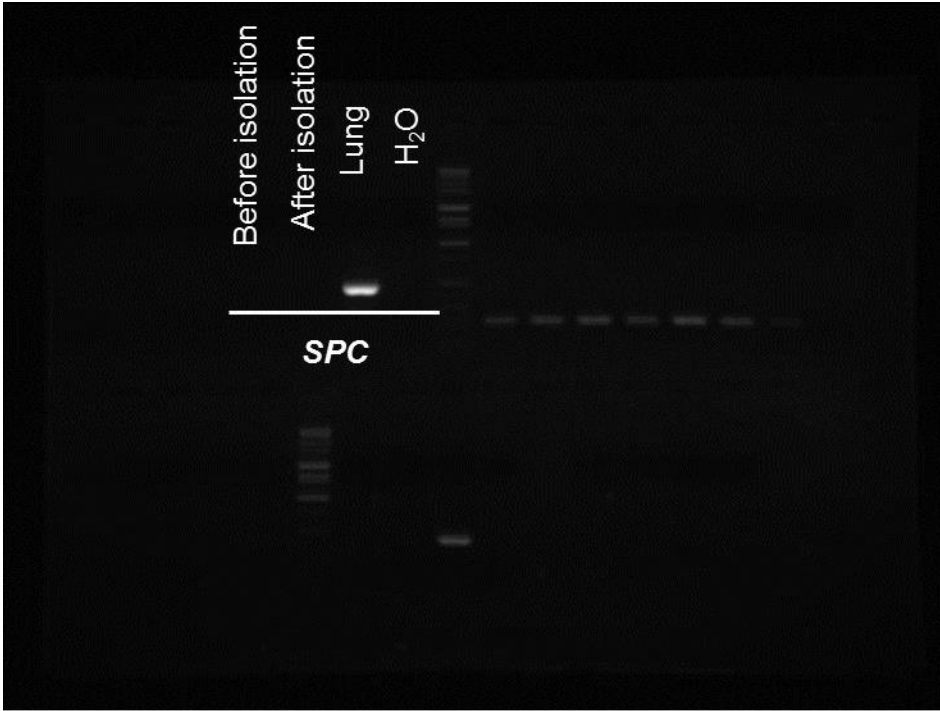

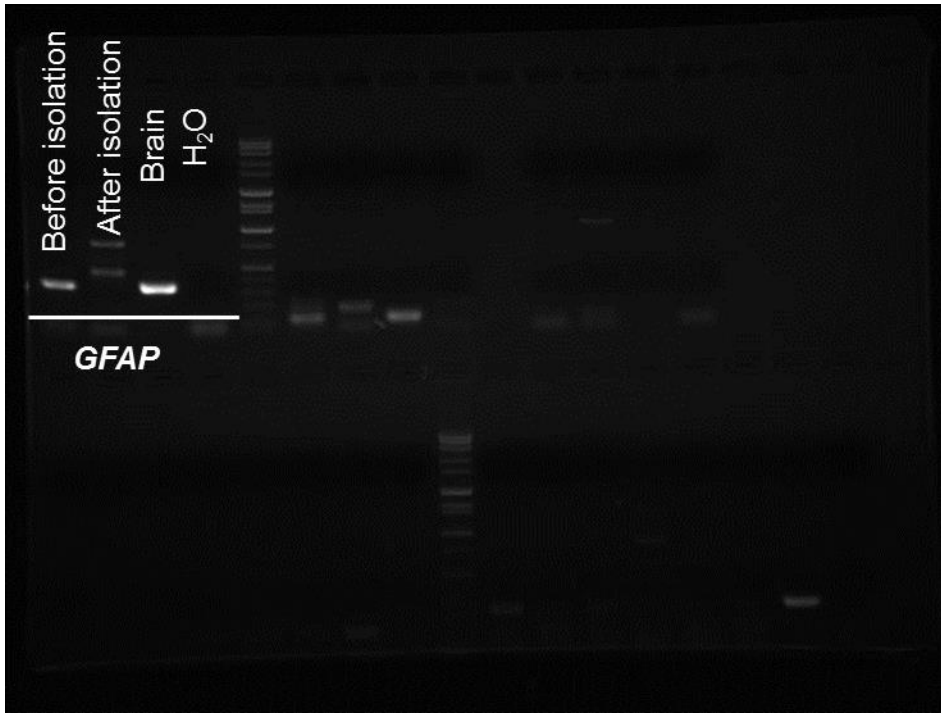

## Supplemental Tables

**Table S1. Efficiency of obtaining OSR1<sup>+</sup>SIX2<sup>+</sup> cells using various combinations of cell surface markers.**

| Combination of surface marker                                               | Induction rate of OSR1 <sup>+</sup> SIX2 <sup>+</sup> cells (%) | Ratio of OSR1 <sup>+</sup> SIX2 <sup>+</sup> cells obtained with each combination (%) |
|-----------------------------------------------------------------------------|-----------------------------------------------------------------|---------------------------------------------------------------------------------------|
| CD9 <sup>-</sup> CD140a <sup>+</sup>                                        | 40.2                                                            | 68.4                                                                                  |
| CD9 <sup>-</sup> CD140b <sup>+</sup>                                        | 40.2                                                            | 63.4                                                                                  |
| CD9 <sup>-</sup> CD271 <sup>+</sup>                                         | 40.2                                                            | 68.5                                                                                  |
| CD9 <sup>-</sup> CD140a <sup>+</sup> CD140b <sup>+</sup>                    | 40.2                                                            | 69.1                                                                                  |
| CD9 <sup>-</sup> CD140a <sup>+</sup> CD271 <sup>+</sup>                     | 40.2                                                            | 73.9                                                                                  |
| CD9 <sup>-</sup> CD140b <sup>+</sup> CD271 <sup>+</sup>                     | 40.2                                                            | 71.3                                                                                  |
| CD9 <sup>-</sup> CD140a <sup>+</sup> CD140b <sup>+</sup> CD271 <sup>+</sup> | 40.2                                                            | 74.0                                                                                  |
| CD140a <sup>+</sup> CD140b <sup>+</sup> CD271 <sup>+</sup>                  | 40.2                                                            | 72.4                                                                                  |



**Table. S2 The induction rate of cells positive for each cell surface marker in differentiation culture by a previously reported method<sup>12</sup>.**

| Experiment | CD9 <sup>+</sup> cells (%) | CD140a <sup>+</sup> cells (%) | CD140b <sup>+</sup> cells (%) | CD271 <sup>+</sup> cells (%) |
|------------|----------------------------|-------------------------------|-------------------------------|------------------------------|
| No.1       | 0.9                        | 95.1                          | 25                            | 5.4                          |
| No.2       | 1.0                        | 83.4                          | 91.5                          | 42.1                         |
| No.3       | 0.7                        | 30.2                          | 43.9                          | 1.0                          |
| Mean ± SE  | 0.9 ± 0.1                  | 69.6 ± 20.0                   | 53.5 ± 19.8                   | 16.2 ± 13.0                  |

**Table S3. The antibodies used for flow cytometry in this study.**

| Antibody                                       | Dilution rate | Manufacturer                       |
|------------------------------------------------|---------------|------------------------------------|
| CD9 APC-H7                                     | 1:20          | BD Biosciences, clone M-L13,655409 |
| Alexa Fluor® 647<br>Mouse anti-Human<br>CD140a | 1:20          | BD Biosciences, 562798             |
| BV421 Mouse anti-Human<br>CD140b               | 1:20          | BD Biosciences, 564124             |
| BV510 Mouse anti-Human<br>CD271                | 1:20          | BD Biosciences, 563451             |
| APC-H7 Mouse IgG1κ                             | 1:20          | BD Biosciences, 560167             |
| APC Mouse IgG1κ                                | 1:20          | BD Biosciences, 550854             |
| BV421 Mouse IgG2ακ                             | 1:20          | BD Biosciences, 562439             |
| BV510 Mouse IgG2ακ                             | 1:20          | BD Biosciences, 562946             |
| PE Mouse anti-Human<br>CD55                    | 1:20          | BD Biosciences, 555694             |
| APC Mouse anti-Human<br>CD55                   | 1:20          | BD Biosciences, 555696             |
| APC Mouse anti-Human<br>CD326                  | 1:20          | Miltenyl Biotec, 130-091-254       |

**Table S4. The primer sets used in this study.**

| <b>Gene name</b>    | <b>Primer Sequence, (5'-3')</b> |
|---------------------|---------------------------------|
| <i>hOSR1</i>        | GCTGTCCACAAGACGCTACA            |
|                     | CCAGAGTCAGGCTTCTGGTC            |
| <i>hSIX2</i>        | AGGAAAGGGAGAACAACGAGAA          |
|                     | GGGCTGGATGATGAGTGGT             |
| <i>hCITED1</i>      | AGGATGCCAACCAAGAGATG            |
|                     | TGGTTCCATTTGAGGCTACC            |
| <i>hITGA8</i>       | CTGTCAGGCGTTCAACC               |
|                     | CACCAAGACACTCGCTGTG             |
| <i>hCDH11</i>       | CAGTCGGCAGAAGCAGG               |
|                     | TTGATGGTGAGGGTGTTGG             |
| <i>hHOXA11</i>      | CGAAGTGACCTTCAGAGAGT            |
|                     | ACGGTGCTATAGAAATTGGA            |
| <i>hHOXD11</i>      | TGGAACGCGAGTTTTTCTTT            |
|                     | CTGCAGACGGTCTCTGTTCA            |
| <i>hEYA1</i>        | CTACTCAGCTCATCCCAGCATT          |
|                     | CATACACCCTTTTCTTCCAAACCT        |
| <i>hWT1</i>         | GGCAGCACAGTGTGTGAACT            |
|                     | CCAGGCACACCTGGTAGTTT            |
| <i>hSALL1</i>       | AGCGAAGCCTCAACATTTCCAATCC       |
|                     | AATTCAAAGAACTCGGCACAGCACC       |
| <i>hNANOG</i>       | GATTTGTGGGCCTGAAGAAA            |
|                     | TTGGGACTGGTGGAAGAATC            |
| <i>hOCT4</i>        | TGGGCTCGAGAAGGATGTG             |
|                     | GCATAGTCGCTGCTTGATCG            |
| <i>hGAPDH</i>       | GAAGGTGAAGGTCGGAGTC             |
|                     | GAAGATGGTGATGGGATTTC            |
| <i>haMHC</i>        | CTGGAGGCCGAGCAGAAGCGCAACG       |
|                     | GTCCGCCCGCTCCTCTGCCTCATCC       |
| <i>hcTnT</i>        | ATGAGCGGGAGAAGGAGCGGCAGAAC      |
|                     | TCAATGGCCAGCACCTTCCTCCTCTC      |
| <i>hGATA1</i>       | CAAGCTTCGTGGAACCTCTCC           |
|                     | ACTGACAATCAGGCGCTTCT            |
| <i>CD45</i>         | TGTGATGCTTGTTCCCTTCA            |
|                     | ACTGGAGTGTGGAGCAGCTT            |
| <i>hVE-CADHERIN</i> | ACACCTCACTTCCCCATCA             |
|                     | GACCTTGCCACATATTCTCC            |

|                                 |                            |
|---------------------------------|----------------------------|
| <i>hMYOGENIN</i>                | TAAGGTGTGTAAGAGGAAGTCG     |
|                                 | CCACAGACACATCTTCCACTGT     |
| <i>hMYOD</i>                    | CGATATACCAGGTGCTCTGAGGG    |
|                                 | GGGTGGGTTACGGTTACACCTGC    |
| <i>hRUNX2</i>                   | ATGCTTCATTGCCTCACAAACAAC   |
|                                 | TGAAGCGCCGGCTGGTGCTC       |
| <i>hPDX1</i>                    | TGTTCCGAGGTAGAGGCTGT       |
|                                 | AACATAACCCGAGCACAAGG       |
| <i>hINS</i>                     | GCCTTTGTGAACCAACACCT       |
|                                 | TGCTGGTTCAAGGGCTTTAT       |
| <i>hFABP2</i>                   | TGCAGCTCATGACAATTTGA       |
|                                 | CCCTGAGTTCAGTTCCGTCT       |
| <i>hCDX2</i>                    | GCAGAGCAAAGGAGAGGAAA       |
|                                 | AAGGGCTCTGGGACACTTCT       |
| <i>hALB</i>                     | CCTTTGGCACAATGAAGTGGGTAACC |
|                                 | CAGCAGTCAGCCATTTACCATAGG   |
| <i>hAAT</i>                     | ACATTTACCCAAACTGTCCATT     |
|                                 | GCTTCAGTCCCTTTCTCGTC       |
| <i>hNKX2.1</i>                  | GTACCAGGACACCATGAGGAAC     |
|                                 | CCATGTTCTTGCTCACGTC        |
| <i>hSPC</i>                     | GAGGTCCTGATGGAGAGC         |
|                                 | GCTTAGACGTAGGCACTG         |
| <i>m<math>\alpha</math>-SMA</i> | GCTCTGCCTCTAGCACACAA       |
|                                 | GCCAGGGCTACAAGTTAAGG       |
| <i>mFSP1</i>                    | GAGGAGGCCCTGGATGTAAT       |
|                                 | CTTCATTGTCCCTGTTGCTG       |
| <i>mCol4a1</i>                  | GCAACGGTACAAAGGGAGAGAG     |
|                                 | CTTCATTCTGGTAACCCTGGTG     |

ITGA8, integrin alpha 8; CDH11, cadherin 11;  $\alpha$ MHC, alpha-myosin heavy chain; cTNT, cardiac troponin T; HUVEC, human umbilical vein endothelial cell; INS, insulin; FABP2, fatty acid binding protein 2; ALB, albumin; AAT, alpha-1 antitrypsin; SPC, surfactant protein C; GFAP, glial fibrillary acidic protein;  $\alpha$ -Sma, alpha-smooth muscle actin; Fsp1, Fibroblast-specific protein 1; Col4a1, alpha-1 subunit of collagen type IV.

## Supplemental Method

### Immunostaining and Lectin Staining

Cells were fixed with 4% paraformaldehyde (PFA, Nacalai Tesque, Kyoto, Japan)/PBS for 10 to 20 min at 4°C. For nuclear immunostaining, the fixed cells were washed twice with PBS and incubated in blocking buffer consisting of 5% normal donkey serum (Merck, Darmstadt, Germany)/PBST (PBS/0.25% Triton X-100) for 1 h at room temperature. The primary antibodies (mouse anti-HOXD11, Abcam Biochemicals; rabbit anti-SIX2, Proteintech, Rosemont, IL, USA; rat anti-GFP, Nacalai Tesque) were diluted in blocking solution at 1:200 for anti-HOXD11 and SIX2 and 1:500 for anti-GFP and incubated with samples overnight at 4°C or 4 h at room temperature. Secondary antibody (anti-Mouse IgG-Alexa 546, anti-Rabbit IgG-Alexa 546, anti-Rabbit IgG-Alexa 488; Thermo Fisher Scientific) was diluted in blocking solution at 1:1,000 and incubated with samples for 1 h at room temperature. Whole-mount immunostaining of organ culture samples was performed as described previously<sup>17</sup>. The cellular aggregates on filters were cut apart from a transwell insert, transferred to 24-well plates and fixed with 4% PFA/PBS for 15 min. For cell surface immunostaining, the fixed cells were washed twice with PBS and incubated in blocking buffer consisting of 5% normal donkey serum/PBST (PBS/0.1% Triton X-100) for 1 h at room temperature. To evaluate the differentiation into proximal renal tubules, staining with biotinylated *Lotus tetragonolobus* lectin (LTL, 1:200; Vector laboratories, Burlingame, CA, USA) and Alexa Fluor 546® streptavidin (1:1,000; Thermo Fisher Scientific) was carried out. For distal renal tubules, immunostaining with anti-E-cadherin (1:200; BD Biosciences) and anti-mouse IgG-Alexa 647

(1:1,000; Thermo Fisher Scientific) was performed. Stained samples were analyzed using a BZ-X700 fluorescence microscope (Keyence, Osaka, Japan). Immunostaining against  $\alpha$ -smooth muscle action ( $\alpha$ -SMA) on kidney sections was performed as described previously using anti- $\alpha$ -SMA antibody (1:300; Sigma-Aldrich)<sup>15</sup>.

### **RT-PCR and Real-time Quantitative RT-PCR (qRT-PCR)**

Total RNA was isolated using an RNeasy kit (Qiagen, Valencia, CA, USA) according to the manufacturer's recommendations, followed by cDNA synthesis using standard protocols. One  $\mu$ g of RNA was used for reverse transcription with ReverTra Ace (TOYOBO, Osaka, Japan), and PCR was carried out using the Ex-Taq PCR kit (Takara Bio, Shiga, Japan) and a thermal cycler (Veriti 96 well Thermal Cycler, Thermo Fisher Scientific) according to the manufacturer's instructions. qRT-PCR was carried out using Step One Plus Real-Time PCR System (Thermo Fisher Scientific) and SYBR Green PCR Master Mix (Takara Bio). Relative quantification was performed against a standard curve, and the expression levels were normalized to a housekeeping gene, GAPDH. The primer sets used in this study are shown in Table S4.
